# Supplementary material for: Epoxygenated Fatty Acids Inhibit Retinal Vascular Inflammation
Source: PubMed Central journal article supplement (PMC5155241; doi:10.1038/srep39211), 2016-12-14
Supplement: srep39211-s1.pdf [file srep39211-s1.pdf]

## **Epoxygenated Fatty Acids Inhibit Retinal Vascular Inflammation**

Megan E. Capozzi<sup>1</sup>, Sandra S. Hammer<sup>2</sup>, Gary W. McCollum<sup>2</sup>, John S. Penn<sup>1,2,\*</sup>

<sup>1</sup>Vanderbilt University, Department of Molecular Physiology and Biophysics, Nashville, TN, USA.

<sup>2</sup>Vanderbilt University Medical Center, Department of Ophthalmology and Visual Sciences, Nashville, TN, USA.

\*Correspondence and requests for materials should be addressed to

[john.penn@vanderbilt.edu](mailto:john.penn@vanderbilt.edu)

**Supplementary Information**

## Supplementary Figure S1

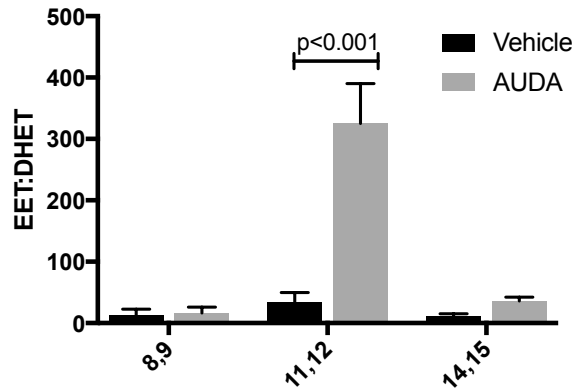

**Supplementary Figure S1. AUDA alters EET-to-DHET ratios.** To verify inhibition of epoxide hydrolysis by AUDA, EET:DHET ratio was measured in AUDA-treated HRMEC. EET:DHET for each isomer was increased, but only the ratio of the 11,12 regioisomer was significantly increased. Each bar represents mean  $\pm$  SD (n=3).

## Supplementary Figure S2

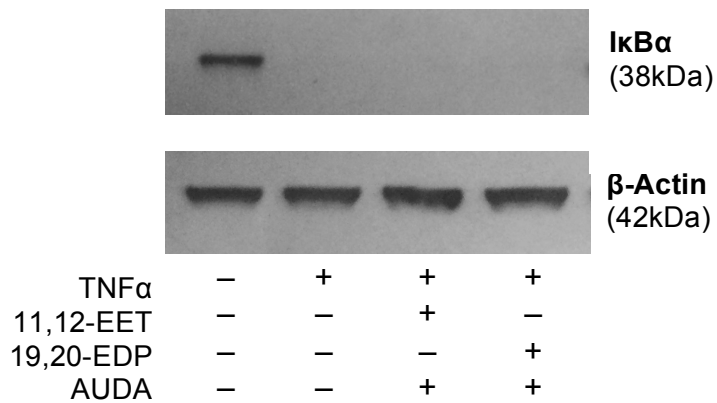

**Supplementary Figure S2. 11,12-EET and 19,20-EDP do not directly exert their effect on IκBα in retinal microvascular endothelial cells.** Treatment with 11,12-EET or 19,20-EDP with AUDA inhibition, as was used in the NFκB activity assay (**Figure 5**), did not prevent TNFα-induced IκBα degradation, suggesting an indirect mechanism of epoxygenated fatty acid inhibition of NFκB in HRMEC.
